# Supplementary material for: Recombinant influenza H9N2 virus with a substitution of H3 hemagglutinin transmembrane domain showed enhanced immunogenicity in mice and chicken
Source: PubMed Central journal article supplement (PMC5738434; doi:10.1038/s41598-017-18054-x), 2017-12-20
Supplement: 41598_2017_18054_MOESM1_ESM.pdf [file 41598_2017_18054_MOESM1_ESM.pdf]

**Recombinant influenza H9N2 virus with a substitution of H3 hemagglutinin  
transmembrane domain showed enhanced immunogenicity in mice and chicken**

Yun Zhang, Ying Wei, Kang Liu, Mengjiao Huang, Ran Li, Yang Wang, Qiliang Liu,  
Jing Zheng, Chunyi Xue, Yongchang Cao\*

State Key Laboratory of Biocontrol, College of Life Sciences, Sun Yat-sen University,  
Guangzhou, 510006, People's Republic China

\*Correspondence: [caoych@mail.sysu.edu.cn](mailto:caoych@mail.sysu.edu.cn)

Yongchang Cao, PhD, Professor

Address: Life Sciences School, Sun Yat-sen University, Guangzhou Higher Education  
Mega Center, P.R.China (510006)

Phone: 86-020-39332934

Fax: 86-020-39332841

E-mail: [caoych@mail.sysu.edu.cn](mailto:caoych@mail.sysu.edu.cn)

**A**

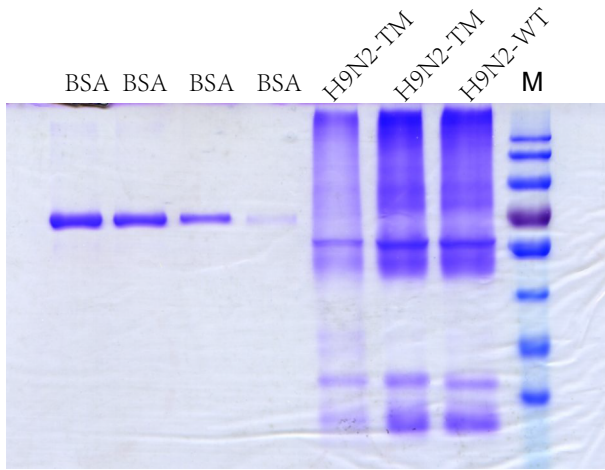

**B**

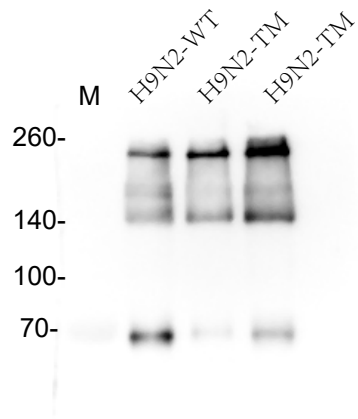

Supplemental Figure 1. Full length blots of Figure 1C and Figure 3A.

(A) Full length blot of Figure 1C. (B) Full length blot of Figure 3A.

.
